# Supplementary material for: FABP4 Controls Fat Mass Expandability (Adipocyte Size and Number) through Inhibition of CD36/SR-B2 Signalling
Source: MDPI journal article supplement (doi:10.3390/ijms24021032), 2023-01-05

## SUPPLEMENTARY FILES

*Suppl Tables S1: Analysis of gene dataset enrichment in mouse FAT/CD36 knock out gene dataset [55]. Significant enrichments are indicated with asterix for z-score confidence levels >95%. The fatty acid dataset has been previously described (Berger et al, 2012 doi: 10.1002/biot.201200188). Analyses of signalling enrichments in fatty acids, adipose stem cells (ASCs), differentiating (dA) and adipose tissue (AT), JAK2 and LKB1/AMP datasets have been previously described [12] [23]; those of extracellular FABP4 and intracellular FABP4 knock out (FABP4) were retrieved from Yamamoto et al, 2016 [50] and Hurley et al, 2012 [55], respectively.*

### *S1A- External stimuli datasets enriched in FAT/CD36 knock out dataset*

|                       | Genome     | CD36 KO mouse                | Fatty acids                  | Adipose stem Cells (ASCs)    | Differentiating adipocytes (dA) | Adipose Tissue (AT)          | FABP4                        | intracellular FABP4 inhibition |
|-----------------------|------------|------------------------------|------------------------------|------------------------------|---------------------------------|------------------------------|------------------------------|--------------------------------|
|                       |            | Gene number<br>Frequency (%) | Gene number<br>Frequency (%) | Gene number<br>Frequency (%) | Gene number<br>Frequency (%)    | Gene number<br>Frequency (%) | Gene number<br>Frequency (%) | Gene number<br>Frequency (%)   |
|                       |            | Significant z-score          | Significant z-score          | Significant z-score          | Significant z-score             | Significant z-score          | Significant z-score          | Significant z-score            |
| With stimulus         | 17349      | 1005                         | 541                          | 234                          | 1243                            | 204                          | ###                          | 524                            |
| ABL                   | 218 1,26   | 24 2,39 *                    | 19 3,5 *                     | 2 0,9                        | 50 4,0 *                        | 3 1,5                        | 21 1,7                       | 7 1,3                          |
| Adenylate cyclase     | 137 0,79   | 12 1,19 *                    | 13 2,4 *                     | 4 1,7                        | 25 2,0 *                        | 10 4,9 *                     | 15 1,2                       | 8 1,5 *                        |
| AKT                   | 1607 9,26  | 129 12,84 *                  | 74 14 *                      | 27 11,5                      | 186 15,0 *                      | 27 13,2                      | 169 14 *                     | 138 26 *                       |
| ARFs                  | 451 2,60   | 36 3,58 *                    | 32 5,9                       | 12 5,1                       | 80 6,4 *                        | 13 6,4 *                     | 47 3,8 *                     | 10 1,9                         |
| ATM                   | 462 2,66   | 47 4,68 *                    | 14 2,6                       | 5 2,1                        | 30 2,4                          | 9 4,4                        | 48 3,9 *                     | 161 31 *                       |
| AURKA                 | 232 1,34   | 19 1,89                      | 10 1,8                       | 0 0,0                        | 22 1,8                          | 2 1,0                        | 23 1,9                       | 84 16 *                        |
| CASP1                 | 369 2,13   | 31 3,08 *                    | 14 2,6                       | 1 0,4                        | 29 2,3                          | 9 4,4 *                      | 43 3,5 *                     | 121 23 *                       |
| CDKN2C                | 405 2,33   | 12 1,19                      | 29 5,4 *                     | 6 2,6                        | 35 2,8                          | 5 2,5                        | 42 3,4 *                     | 78 15 *                        |
| COP1                  | 78 0,45    | 3 0,30                       | 2 0,4                        | 1 0,4                        | 10 0,8                          | 3 1,5 *                      | 8 0,7                        | 3 0,6                          |
| COX-2 (PTGS2)         | 1387 7,99  | 131 13,03 *                  | 34 6,3                       | 18 7,7                       | 59 4,7                          | 15 7,4                       | 133 11 *                     | 5 1                            |
| DUSP1                 | 428 2,47   | 33 3,28 *                    | 17 3,1                       | 2 0,9                        | 25 2,0                          | 5 2,5                        | 47 3,8 *                     | 106 20 *                       |
| FGFR1                 | 317 1,83   | 34 3,38 *                    | 11 2                         | 3 1,3                        | 28 2,3                          | 7 3,4                        | 33 2,7 *                     | 126 24 *                       |
| Glucose oxidase       | 179 1,03   | 17 1,69 *                    | 10 1,8 *                     | 2 0,9                        | 25 2,0 *                        | 6 2,9 *                      | 14 1,1                       | 14 2,7                         |
| Glycolysis (2DG)      | 251 1,45   | 24 2,39 *                    | 17 3,1 *                     | 5 2,1 *                      | 49 3,9 *                        | 8 3,9 *                      | 30 2,4 *                     | 12 2,3                         |
| HDACs                 | 938 5,41   | 65 6,47 *                    | 50 9,2 *                     | 13 5,6                       | 104 8,4 *                       | 19 9,3 *                     | 83 6,8 *                     | 25 4,8                         |
| ID1                   | 445 2,56   | 40 3,98 *                    | 18 3,3                       | 5 2,1                        | 36 2,9                          | 9 4,4                        | 36 2,9                       | 103 20 *                       |
| IKBKB                 | 347 2,00   | 36 3,58 *                    | 12 2,2                       | 3 1,3                        | 23 1,9                          | 7 3,4                        | 40 3,3 *                     | 117 22 *                       |
| IKBKE                 | 294 1,69   | 36 3,58 *                    | 10 1,8                       | 4 1,7                        | 24 1,9                          | 6 2,9                        | 27 2,2 *                     | 130 25 *                       |
| IKBK                  | 364 2,10   | 33 3,28 *                    | 14 2,6                       | 4 1,7                        | 24 1,9                          | 5 2,5                        | 37 3 *                       | 101 19 *                       |
| JAK2                  | 243 1,40   | 33 3,28 *                    | 24 4,4 *                     | 3 1,3                        | 53 4,3                          | 9 4,4 *                      | 46 3,8 *                     | 19 3,6 *                       |
| JAK3                  | 871 5,02   | 81 8,06 *                    | 31 5,7                       | 12 5,1                       | 67 5,4                          | 13 6,4                       | 98 8 *                       | 31 5,9                         |
| Metformin             | 1285 7,41  | 150 14,93                    | 68 13 *                      | 14 6,0                       | 183 14,7                        | 26 12,7                      | 7 0,6                        | 18 3,4                         |
| LSD1                  | 509 2,93   | 49 4,88 *                    | 28 5,2 *                     | 4 1,7                        | 48 3,9                          | 6 2,9                        | 54 4,4 *                     |                                |
| Erk1/2                | 2153 12,41 | 183 18,21 *                  | 78 14 *                      | 32 13,7                      | 151 12,1                        | 31 15,2                      | 204 17 *                     | 285 54 *                       |
| MAP4K4                | 495 2,85   | 48 4,78 *                    | 17 3,1 *                     |                              |                                 |                              | 82 6,7 *                     |                                |
| MKK5/Erk5             | 30 0,17    | 4 0,40                       | 2 0,4                        | 0 0,0                        | 13 1,0 *                        | 4 2,0 *                      | 2 0,2                        | 0 0                            |
| NOX1                  | 1252 7,22  | 87 8,66                      | 65 12 *                      | 17 7,3                       | 203 16,3 *                      | 35 17,2 *                    | 95 7,7                       | 49 9,4 *                       |
| P38MAPK               | 691 3,98   | 62 6,17 *                    | 21 3,9                       | 6 2,6                        | 66 5,3 *                        | 16 7,8 *                     | 46 3,8                       | 133 25 *                       |
| PDGFRB                | 279 1,61   | 29 2,89 *                    | 10 1,8                       | 1 0,4                        | 24 1,9                          | 5 2,5                        | 35 2,9 *                     | 104 20 *                       |
| Pi3K                  | 704 4,06   | 70 6,97 *                    | 28 5,2                       | 10 4,3                       | 64 5,1                          | 11 5,4                       | 67 5,5 *                     | 140 27                         |
| N-RAS                 | 455 2,62   | 31 3,08                      | 22 4,1 *                     | 4 1,7                        | 105 8,4 *                       | 13 6,4 *                     | 25 2                         | 11 2,1                         |
| RRM2B (P53R2)         | 81 0,47    | 7 0,70                       | 6 1,1 *                      | 1 0,4                        | 12 1,0 *                        | 4 2,0 *                      | 5 0,4                        | 1 0,2                          |
| Wnt/bCatenin (CTNNB1) | 687 3,96   | 56 5,57 *                    | 33 6,1 *                     | 4 1,7                        | 56 4,5                          | 15 7,4 *                     | 54 4,4                       | 105 20 *                       |

### pathway gene datasets

|                       | Genome      | CD36 KO mouse | Fatty acids | Adipose stem Cells (ASCs) | Differentiating adipocytes (dA) | Adipose Tissue (AT) | FABP4         | intracellular FABP4 inhibition |             |               |                     |      |   |    |      |    |     |     |     |     |     |   |
|-----------------------|-------------|---------------|-------------|---------------------------|---------------------------------|---------------------|---------------|--------------------------------|-------------|---------------|---------------------|------|---|----|------|----|-----|-----|-----|-----|-----|---|
|                       | Gene number | Frequency (%) | Gene number | Frequency (%)             | Significant z-score             | Gene number         | Frequency (%) | Significant z-score            | Gene number | Frequency (%) | Significant z-score |      |   |    |      |    |     |     |     |     |     |   |
| With stimulus         | 17349       | 1005          | 541         | 234                       | 1243                            | 204                 | ###           | 524                            |             |               |                     |      |   |    |      |    |     |     |     |     |     |   |
| ABL                   | 218         | 1,26          | 24          | 2,39                      | *                               | 19                  | 3,5           | *                              | 2           | 0,9           | 50                  | 4,0  | * | 3  | 1,5  | 21 | 1,7 | 7   | 1,3 |     |     |   |
| Adenylate cyclase     | 137         | 0,79          | 12          | 1,19                      | *                               | 13                  | 2,4           | *                              | 4           | 1,7           | 25                  | 2,0  | * | 10 | 4,9  | *  | 15  | 1,2 | 8   | 1,5 | *   |   |
| AKT                   | 1607        | 9,26          | 129         | 12,84                     | *                               | 74                  | 14            | *                              | 27          | 11,5          | 186                 | 15,0 | * | 27 | 13,2 | *  | 169 | 14  | *   | 138 | 26  | * |
| ARFs                  | 451         | 2,60          | 36          | 3,58                      | *                               | 32                  | 5,9           | *                              | 12          | 5,1           | 80                  | 6,4  | * | 13 | 6,4  | *  | 47  | 3,8 | *   | 10  | 1,9 | * |
| ATM                   | 462         | 2,66          | 47          | 4,68                      | *                               | 14                  | 2,6           | *                              | 5           | 2,1           | 30                  | 2,4  | * | 9  | 4,4  | *  | 48  | 3,9 | *   | 161 | 31  | * |
| AURKA                 | 232         | 1,34          | 19          | 1,89                      | *                               | 10                  | 1,8           | *                              | 0           | 0,0           | 22                  | 1,8  | * | 2  | 1,0  | *  | 23  | 1,9 | *   | 84  | 16  | * |
| CASP1                 | 369         | 2,13          | 31          | 3,08                      | *                               | 14                  | 2,6           | *                              | 1           | 0,4           | 29                  | 2,3  | * | 9  | 4,4  | *  | 43  | 3,5 | *   | 121 | 23  | * |
| CDKN2C                | 405         | 2,33          | 12          | 1,19                      | *                               | 29                  | 5,4           | *                              | 6           | 2,6           | 35                  | 2,8  | * | 5  | 2,5  | *  | 42  | 3,4 | *   | 78  | 15  | * |
| COP1                  | 78          | 0,45          | 3           | 0,30                      | *                               | 2                   | 0,4           | *                              | 1           | 0,4           | 10                  | 0,8  | * | 3  | 1,5  | *  | 8   | 0,7 | *   | 3   | 0,6 | * |
| COX-2 (PTGS2)         | 1387        | 7,99          | 131         | 13,03                     | *                               | 34                  | 6,3           | *                              | 18          | 7,7           | 59                  | 4,7  | * | 15 | 7,4  | *  | 133 | 11  | *   | 5   | 1   | * |
| DUSP1                 | 428         | 2,47          | 33          | 3,28                      | *                               | 17                  | 3,1           | *                              | 2           | 0,9           | 25                  | 2,0  | * | 5  | 2,5  | *  | 47  | 3,8 | *   | 106 | 20  | * |
| FGFR1                 | 317         | 1,83          | 34          | 3,38                      | *                               | 11                  | 2             | *                              | 3           | 1,3           | 28                  | 2,3  | * | 7  | 3,4  | *  | 33  | 2,7 | *   | 126 | 24  | * |
| Glucose oxidase       | 179         | 1,03          | 17          | 1,69                      | *                               | 10                  | 1,8           | *                              | 2           | 0,9           | 25                  | 2,0  | * | 6  | 2,9  | *  | 14  | 1,1 | *   | 14  | 2,7 | * |
| Glycolysis (2DG)      | 251         | 1,45          | 24          | 2,39                      | *                               | 17                  | 3,1           | *                              | 5           | 2,1           | 49                  | 3,9  | * | 8  | 3,9  | *  | 30  | 2,4 | *   | 12  | 2,3 | * |
| HDACs                 | 938         | 5,41          | 65          | 6,47                      | *                               | 50                  | 9,2           | *                              | 13          | 5,6           | 104                 | 8,4  | * | 19 | 9,3  | *  | 83  | 6,8 | *   | 25  | 4,8 | * |
| ID1                   | 445         | 2,56          | 40          | 3,98                      | *                               | 18                  | 3,3           | *                              | 5           | 2,1           | 36                  | 2,9  | * | 9  | 4,4  | *  | 36  | 2,9 | *   | 103 | 20  | * |
| IKBKB                 | 347         | 2,00          | 36          | 3,58                      | *                               | 12                  | 2,2           | *                              | 3           | 1,3           | 23                  | 1,9  | * | 7  | 3,4  | *  | 40  | 3,3 | *   | 117 | 22  | * |
| IKBEK                 | 294         | 1,69          | 36          | 3,58                      | *                               | 10                  | 1,8           | *                              | 4           | 1,7           | 24                  | 1,9  | * | 6  | 2,9  | *  | 27  | 2,2 | *   | 130 | 25  | * |
| IKBKG                 | 364         | 2,10          | 33          | 3,28                      | *                               | 14                  | 2,6           | *                              | 4           | 1,7           | 24                  | 1,9  | * | 5  | 2,5  | *  | 37  | 3   | *   | 101 | 19  | * |
| JAK2                  | 243         | 1,40          | 33          | 3,28                      | *                               | 24                  | 4,4           | *                              | 3           | 1,3           | 53                  | 4,3  | * | 9  | 4,4  | *  | 46  | 3,8 | *   | 19  | 3,6 | * |
| JAK3                  | 871         | 5,02          | 81          | 8,06                      | *                               | 31                  | 5,7           | *                              | 12          | 5,1           | 67                  | 5,4  | * | 13 | 6,4  | *  | 98  | 8   | *   | 31  | 5,9 | * |
| Metformin             | 1285        | 7,41          | 150         | 14,93                     | *                               | 68                  | 13            | *                              | 14          | 6,0           | 183                 | 14,7 | * | 26 | 12,7 | *  | 7   | 0,6 | *   | 18  | 3,4 | * |
| LSD1                  | 509         | 2,93          | 49          | 4,88                      | *                               | 28                  | 5,2           | *                              | 4           | 1,7           | 48                  | 3,9  | * | 6  | 2,9  | *  | 54  | 4,4 | *   |     |     |   |
| Erk1/2                | 2153        | 12,41         | 183         | 18,21                     | *                               | 78                  | 14            | *                              | 32          | 13,7          | 151                 | 12,1 | * | 31 | 15,2 | *  | 204 | 17  | *   | 285 | 54  | * |
| MAP4K4                | 495         | 2,85          | 48          | 4,78                      | *                               | 17                  | 3,1           | *                              |             |               |                     |      |   |    |      |    | 82  | 6,7 | *   |     |     |   |
| MKK5/Erk5             | 30          | 0,17          | 4           | 0,40                      | *                               | 2                   | 0,4           | *                              | 0           | 0,0           | 13                  | 1,0  | * | 4  | 2,0  | *  | 2   | 0,2 | *   | 0   | 0   | * |
| NOX1                  | 1252        | 7,22          | 87          | 8,66                      | *                               | 65                  | 12            | *                              | 17          | 7,3           | 203                 | 16,3 | * | 35 | 17,2 | *  | 95  | 7,7 | *   | 49  | 9,4 | * |
| P38MAPK               | 691         | 3,98          | 62          | 6,17                      | *                               | 21                  | 3,9           | *                              | 6           | 2,6           | 66                  | 5,3  | * | 16 | 7,8  | *  | 46  | 3,8 | *   | 133 | 25  | * |
| PDGFRB                | 279         | 1,61          | 29          | 2,89                      | *                               | 10                  | 1,8           | *                              | 1           | 0,4           | 24                  | 1,9  | * | 5  | 2,5  | *  | 35  | 2,9 | *   | 104 | 20  | * |
| Pi3K                  | 704         | 4,06          | 70          | 6,97                      | *                               | 28                  | 5,2           | *                              | 10          | 4,3           | 64                  | 5,1  | * | 11 | 5,4  | *  | 67  | 5,5 | *   | 140 | 27  | * |
| N-RAS                 | 455         | 2,62          | 31          | 3,08                      | *                               | 22                  | 4,1           | *                              | 4           | 1,7           | 105                 | 8,4  | * | 13 | 6,4  | *  | 25  | 2   | *   | 11  | 2,1 | * |
| RRM2B (P53R2)         | 81          | 0,47          | 7           | 0,70                      | *                               | 6                   | 1,1           | *                              | 1           | 0,4           | 12                  | 1,0  | * | 4  | 2,0  | *  | 5   | 0,4 | *   | 1   | 0,2 | * |
| Wnt/bCatenin (CTNNB1) | 687         | 3,96          | 56          | 5,57                      | *                               | 33                  | 6,1           | *                              | 4           | 1,7           | 56                  | 4,5  | * | 15 | 7,4  | *  | 54  | 4,4 | *   | 105 | 20  | * |

# S1C: FAT/CD36 knock out and FABP4 comparison with transcriptional regulator gene

## datasets

|               | Genome      |      | CD36 KO mouse |         | Fatty acids         |        | Adipose stem Cells (ASCs) |        | Differentiating adipocytes (dA) |          | Adipose Tissue (AT) |        | FABP4               |         | intracellular FABP4 inhibition |        |
|---------------|-------------|------|---------------|---------|---------------------|--------|---------------------------|--------|---------------------------------|----------|---------------------|--------|---------------------|---------|--------------------------------|--------|
|               | Gene number |      | Frequency (%) |         | Significant z-score |        | Significant z-score       |        | Significant z-score             |          | Significant z-score |        | Significant z-score |         | Significant z-score            |        |
| Genes with FT | 15049       | 63,7 |               |         | 531                 | 85,4   | 237                       | 67,7   | 1276                            | 79,5     | 220                 | 84,9   | 1133                | 47,1    | 286                            | 46,7   |
| ARFs          | 437         | 2,90 | 2             | 1,08    | 27                  | 5,08 * | 12                        | 5,06   | 81                              | 6,35 *   | 13                  | 5,91   |                     | 0,00    | 10                             | 3,5    |
| CEBPD         | 758         | 5,04 | 12            | 6,49    | 63                  | 11,9 * | 10                        | 4,22   | 88                              | 6,9 *    | 19                  | 8,64 * | 78                  | 6,88 *  | 46                             | 16,1 * |
| CEBPG         | 329         | 2,19 | 10            | 5,41 *  | 19                  | 3,58 * | 1                         | 0,42   | 45                              | 3,53 *   | 9                   | 4,09   | 44                  | 3,88 *  | 40                             | 14 *   |
| CEBPZ         | 445         | 2,96 | 12            | 6,49 *  | 36                  | 6,78 * | 6                         | 2,53   | 45                              | 3,53     | 14                  | 6,36 * | 46                  | 4,06 *  | 58                             | 20,3 * |
| CHREBP HEPG2  | 781         | 5,19 | 16            | 8,65    | 49                  | 9,23 * | 13                        | 5,49   | 95                              | 7,45 *   | 18                  | 8,18 * | 70                  | 6,18 *  | 15                             | 5,24   |
| CREB          | 1074        | 7,14 | 20            | 10,81   | 84                  | 15,8 * | 7                         | 2,95   | 200                             | 15,7 *   | 35                  | 15,9 * | 110                 | 9,71 *  | 57                             | 19,9 * |
| CREBBP        | 498         | 3,31 | 6             | 3,24    | 28                  | 5,27 * | 5                         | 2,11   | 45                              | 3,53     | 17                  | 7,73 * | 71                  | 6,27 *  | 31                             | 10,8 * |
| CREM          | 336         | 2,23 | 6             | 3,24    | 17                  | 3,2    | 3                         | 1,27   | 46                              | 3,61 *   | 5                   | 2,27   | 36                  | 3,18 *  | 34                             | 11,9 * |
| EAF1 (ELL)    | 491         | 3,26 | 9             | 4,86    | 16                  | 3,01   | 12                        | 5,06   | 46                              | 3,61     | 11                  | 5      | 68                  | 6,00 *  | 60                             | 21 *   |
| EBF1          | 142         | 0,94 | 3             | 1,62    | 5                   | 0,94   | 2                         | 0,84   | 16                              | 1,25     | 0                   | 0      | 20                  | 1,77 *  | 3                              | 1,05   |
| ERRA          | 1163        | 7,73 | 16            | 8,65    | 85                  | 16 *   | 31                        | 13,1 * | 138                             | 10,8 *   | 18                  | 8,18   | 96                  | 8,47 *  |                                |        |
| ESR1, ESR2    | 844         | 5,61 | 15            | 8,11    | 10                  | 1,88   | 1                         | 0,42   | 33                              | 2,59     | 7                   | 3,18   | 101                 | 8,91 *  | 1                              | 0,35   |
| Ets           | 100         | 0,66 | 1             | 0,54    | 9                   | 1,69 * | 0                         | 0      | 25                              | 1,96 *   | 5                   | 2,27 * | 14                  | 1,24    | 2                              | 0,7    |
| FABP4intra    | 286         | 1,90 | 8             | 4,32 *  | 19                  | 3,58 * | 18                        | 7,59   | 57                              | 4,47     | 13                  | 5,91   | 46                  | 4,06 *  |                                |        |
| FOXO1A        | 834         | 5,54 | 7             | 3,78    | 86                  | 16,2 * | 10                        | 4,22   | 142                             | 11,1 *   | 22                  | 10 *   | 70                  | 6,18 *  | 41                             | 14,3 * |
| FOXO3A        | 915         | 6,08 | 16            | 8,65 no | 43                  | 8,1 no | 20                        | 8,44 * | 76                              | 5,96     | 15                  | 6,82   | 98                  | 8,65 *  | 43                             | 15 *   |
| FXRA          | 967         | 6,43 | 24            | 12,97 * | 33                  | 6,21   | 11                        | 4,64   | 98                              | 7,68     | 21                  | 9,55   | 121                 | 10,68 * | 23                             | 8,04   |
| HES1          | 297         | 1,97 | 13            | 7,03 *  | 11                  | 2,07   | 5                         | 2,11   | 31                              | 2,43     | 5                   | 2,27   | 40                  | 3,53 *  | 45                             | 15,7 * |
| HIF1A         | 284         | 1,89 | 3             | 1,62    | 43                  | 8,1 *  | 2                         | 0,84   | 57                              | 4,47 *   | 8                   | 3,64   | 31                  | 2,74 *  | 4                              | 1,4    |
| HIF2A         | 25          | 0,17 |               | 0,00    | 4                   | 0,75 * | 0                         | 0      | 13                              | 1,02 *   | 2                   | 0,91 * | 3                   | 0,26    | 1                              | 0,35 * |
| HNF4          | 1001        | 6,65 | 29            | 15,68 * | 6                   | 1,13   | 19                        | 8,02   | 175                             | 13,7 *   | 29                  | 13,2 * | 148                 | 13,06 * | 27                             | 9,44   |
| LXR           | 186         | 1,24 | 8             | 4,32 *  | 29                  | 5,46 * | 2                         | 0,84   | 38                              | 2,98 *   | 11                  | 5 *    | 29                  | 2,56 *  | 8                              | 2,8 *  |
| MIZ-1         | 43          | 0,29 | 2             | 1,08 no | 6                   | 1,13 * | 2                         | 0,84   | 10                              | 0,78 *   | 1                   | 0,45   | 5                   | 0,44    |                                |        |
| MYC           | 789         | 5,24 | 9             | 4,86    | 79                  | 14,9 * | 11                        | 4,64   | 158                             | 12,4 *   | 35                  | 15,9 * | 56                  | 4,94    | 7                              | 2,45   |
| NFAT          | 97          | 0,64 | 5             | 2,70 *  | 7                   | 1,32   | 2                         | 0,84   | 11                              | 0,86 non | 3                   | 1,36   | 8                   | 0,71    | 3                              | 1,05   |
| NFE2L2(NRF2)  | 191         | 1,27 | 2             | 1,08    | 13                  | 2,45 * | 1                         | 0,42   | 62                              | 4,86 *   | 11                  | 5 *    | 36                  | 3,18 *  | 1                              | 0,35   |
| NFKB          | 378         | 2,51 | 7             | 3,78    | 43                  | 8,1 *  | 7                         | 2,95   | 102                             | 7,99 *   | 22                  | 10     | 48                  | 4,24 *  | 8                              | 2,8    |
| PPARA         | 114         | 0,76 | 4             | 2,16    | 29                  | 5,46 * | 0                         | 0      | 36                              | 2,82 *   | 13                  | 5,91   | 17                  | 1,50 *  | 3                              | 1,05   |
| PPARD         | 100         | 0,66 | 3             | 1,62    | 23                  | 4,33 * | 1                         | 0,42   | 30                              | 2,35 *   | 8                   | 3,64   | 11                  | 0,97    | 4                              | 1,4 *  |
| PPARG         | 647         | 4,30 | 13            | 7,03    | 72                  | 13,6 * | 7                         | 2,95   | 147                             | 11,5 *   | 33                  | 15     | 53                  | 4,68    | 22                             | 7,69   |
| PPARGC1A      | 624         | 4,15 | 11            | 5,95    | 43                  | 8,1 *  | 12                        | 5,06   | 136                             | 10,7 *   | 21                  | 9,55   | 120                 | 10,59 * | 17                             | 5,94   |
| RARs          | 559         | 3,71 | 17            | 9,19 *  | 30                  | 5,65 * | 12                        | 5,06   | 75                              | 5,88 *   | 15                  | 6,82   | 67                  | 5,91 *  | 62                             | 21,7 * |
| RB1           | 620         | 4,12 | 8             | 4,32    | 44                  | 8,29 * | 7                         | 2,95   | 45                              | 3,53 *   | 9                   | 4,09   | 75                  | 6,62 *  | 3                              | 1,05   |
| RXR           | 371         | 2,47 | 10            | 5,41 *  | 30                  | 5,65 * | 6                         | 2,53   | 70                              | 5,49 *   | 12                  | 5,45   | 39                  | 3,44 *  | 36                             | 12,6 * |
| SMADS         | 125         | 0,83 | 2             | 1,08    | 14                  | 2,64 * | 3                         | 1,27   | 39                              | 3,06 *   | 8                   | 3,64   | 15                  | 1,32    | 1                              | 0,35   |
| SP1           | 284         | 1,89 | 9             | 4,86 *  | 14                  | 2,64   | 3                         | 1,27   | 32                              | 2,51     | 5                   | 2,27   | 35                  | 3,09 *  | 42                             | 14,7 * |
| SREBP1c       | 524         | 3,48 | 16            | 8,65 *  | 62                  | 11,7 * | 8                         | 3,38   | 113                             | 8,86 *   | 27                  | 12,3   | 42                  | 3,71    | 13                             | 4,55   |
| SRF           | 197         | 1,31 | 7             | 3,78 *  | 5                   | 0,94   | 2                         | 0,84   | 27                              | 2,12 *   | 7                   | 3,18   | 30                  | 2,65 *  | 38                             | 13,3 * |
| STATs         | 347         | 2,31 | 10            | 5,41 *  | 20                  | 3,77   | 5                         | 2,11   | 54                              | 4,23 *   | 12                  | 5,45   | 42                  | 3,71 *  | 43                             | 15 *   |
| USF           | 509         | 3,38 | 13            | 7,03 *  | 29                  | 5,46 * | 11                        | 4,64   | 65                              | 5,09 *   | 18                  | 8,18   | 74                  | 6,53 *  | 51                             | 17,8 * |

*S1D: Transcriptional regulator signalling genedatasets commonly regulated by FABP4 (extracellular) and intracellular FABP4 inhibition (FABP4i), JAK2 and LKB1/AMPK pathways.*

Only pathways with significant z-score for confidence levels are reported, with frequency in gene dataset (%).

|                       | FABP4 | JAK2        | LKB1/AMPK | FABP4i | Target genes                         |
|-----------------------|-------|-------------|-----------|--------|--------------------------------------|
| ARFs (dA)             |       | 6,81        |           |        | PPARG                                |
| CEBPD (dA, AT)        | 6,88  | 10,47       | 8,2       | 20,28  |                                      |
| CEBPG (dA)            | 3,88  | 6,81        |           | 18,18  |                                      |
| CEBPZ (AT)            | 4,06  | 6,28        |           | 25,17  |                                      |
| ChREBP (dA, AT)       | 6,18  |             |           | 7,69   |                                      |
| CREB (dA, AT)         | 9,71  | 25,65       | 9,6       | 24,83  | G9S2, PPARG                          |
| CREBBP (AT)           | 6,27  |             |           | 13,99  |                                      |
| CREM (dA)             | 3,18  | 5,24        |           | 14,69  |                                      |
| EAF1 (ELL)            | 6,00  | 6,81        |           | 25,87  |                                      |
| EBF1                  | 1,77  |             |           |        |                                      |
| ERRA (ASCs, dA)       | 8,47  | 12,57       |           |        |                                      |
| Ets (dA, AT)          |       | 5,24        |           |        |                                      |
| FABP4 (ASCs, dA, AT)  | 4,06  | 7,33        |           |        |                                      |
| FOXO1A (dA, AT)       | 6,18  | 10,47       | 7,91      | 18,18  |                                      |
| FOXO3A (ASCs)         | 8,65  | 12,57       | 13,53     | 23,08  |                                      |
| FXRA                  | 10,68 | 13,09       |           | 10,14  |                                      |
| HES1                  | 3,53  |             |           | 20,28  |                                      |
| HIF1A (dA)            | 2,74  |             |           |        |                                      |
| HIF2A (dA, AT)        |       |             |           |        |                                      |
| HNF4 (dA, AT)         | 13,06 | 14,66       | 8,78      | 11,19  |                                      |
| LXR (dA, AT)          | 2,56  |             |           | 3,50   | CD36                                 |
| MYC (dA, AT)          |       |             | 7,63      |        |                                      |
| NFAT                  |       | 3,66        |           |        |                                      |
| NFE2L2(NRF2) (dA, AT) | 3,18  | 3,66        |           |        |                                      |
| NFKB (dA)             | 4,24  | 12,57       |           |        |                                      |
| PPARA (dA)            | 1,50  | 2,62        | 1,44      |        | FAT/CD36                             |
| PPARD (dA)            |       |             | 1,44      |        | CEBPA                                |
| <b>PPARG (dA)</b>     |       | <b>9,42</b> |           |        | <b>FAT/CD36, CIDEA, FABP4, PPARG</b> |
| PPARGC1A (dA)         | 10,59 | 21,47       | 7,91      |        |                                      |
| RARs (dA)             | 5,91  | 7,85        |           |        | PPARG                                |
| RXRs (dA)             | 3,44  | 8,90        |           |        |                                      |
| SP1                   | 3,09  |             |           |        |                                      |
| SRF (dA)              | 2,65  | 6,28        |           | 16,43  |                                      |
| STATs (dA)            |       |             |           | 18,88  |                                      |
| USF (dA)              | 6,53  | 7,85        |           | 22,03  | PPARG                                |

*Suppl Figure S1: Extracellular FABP4 does not affect adipocyte size or lipolytic activity.*

S2A-Realtime monitoring of 3T3-L1 adipocytes treated with recombinant FABP4 (FABP4r 20 nG/mL) in culture media containing either low glucose (1 g/L), high glucose (HG, 4.5 g/L) with or without Insulin 0.05 U/mL.

S2B-C Volume of TG/cell according to cell line treatment.

Data are presented as mean values  $\pm$  SEM (n=8 biological replicates) without significant differences in independent experiments in (B), or significant differences with different letters in (C), Anova test p-values  $p < 0.05$ .

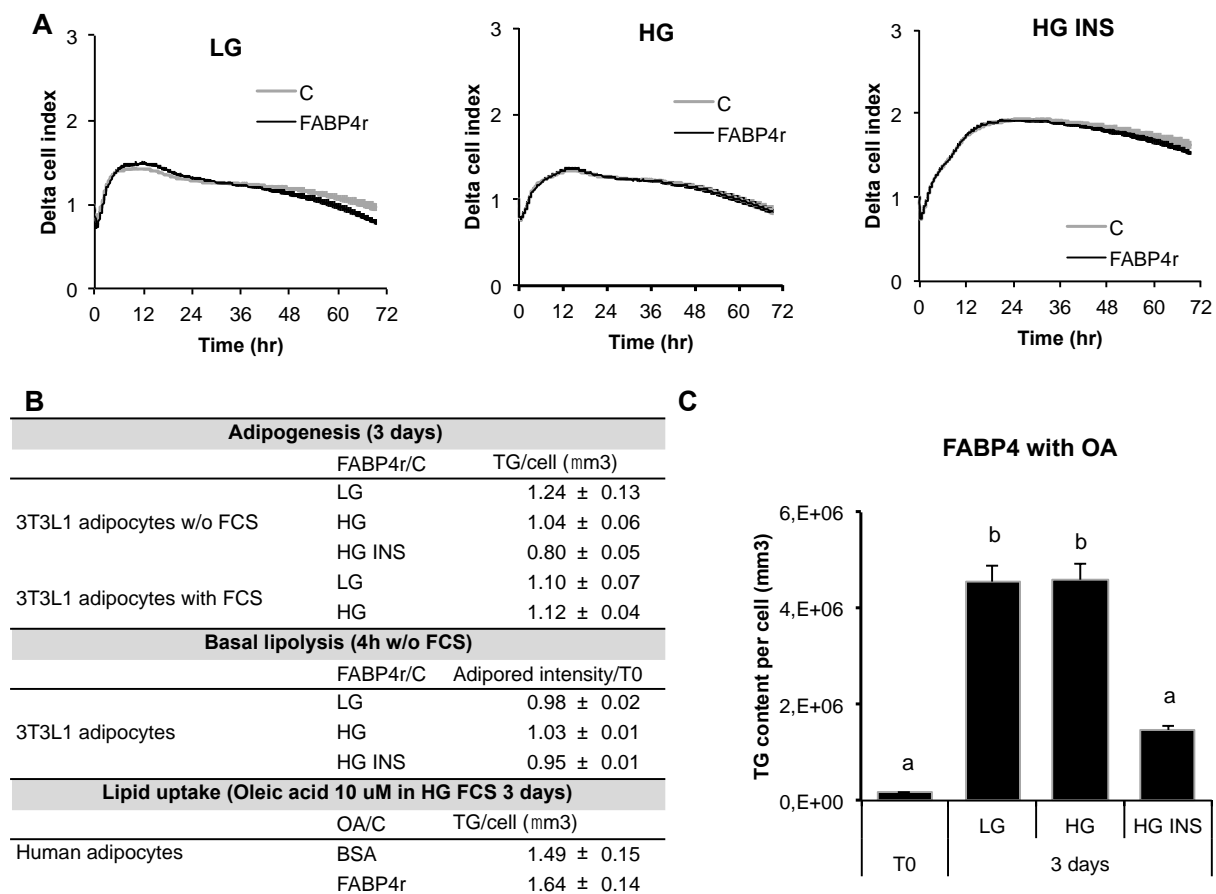

Supplement: s1 [file s1]
